# Supplementary material for: Coronary Artery-Bypass-Graft Surgery Increases the Plasma Concentration of Exosomes Carrying a Cargo of Cardiac MicroRNAs: An Example of Exosome Trafficking Out of the Human Heart with Potential for Cardiac Biomarker Discovery
Source: PLOS journal article supplement (doi:10.1371/journal.pone.0154274), 2016-04-29
Supplement: S2 (10.1371/journal.pone.0154274.s002) [file journal.pone.0154274.s002]

# Supplemental Figure 1

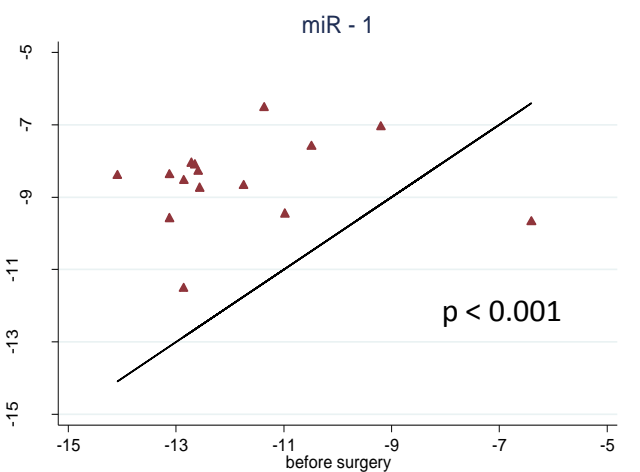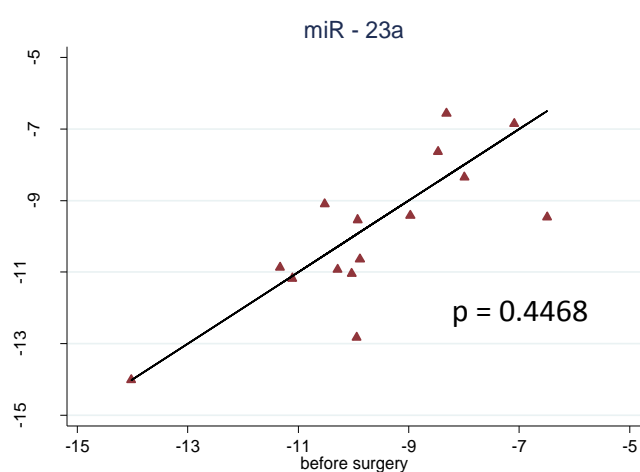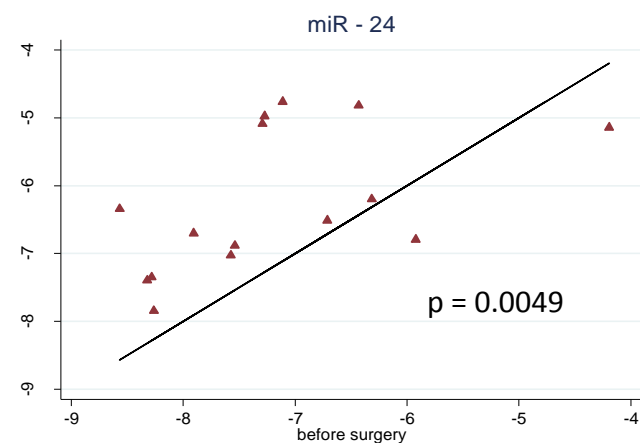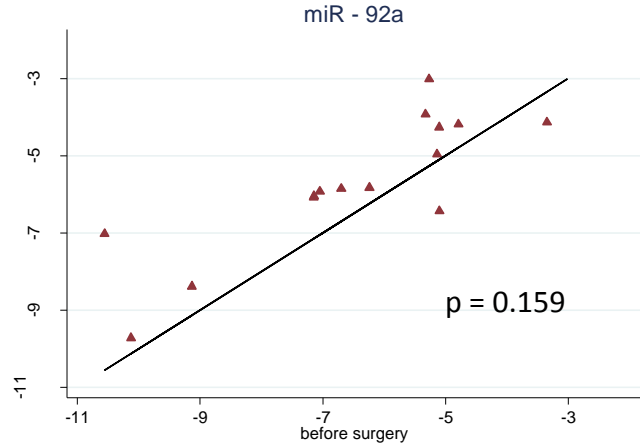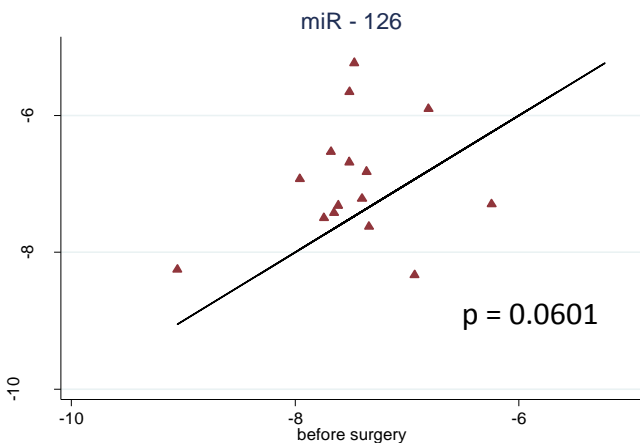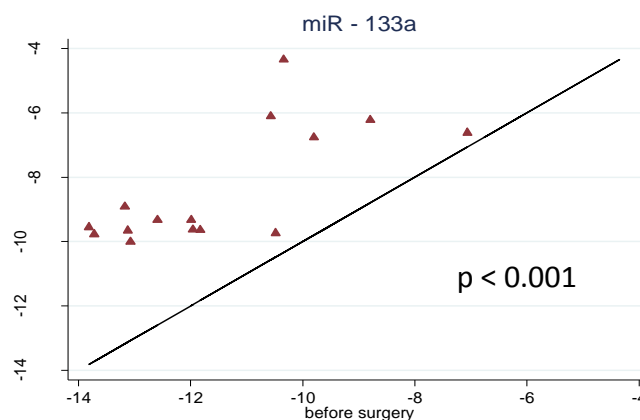

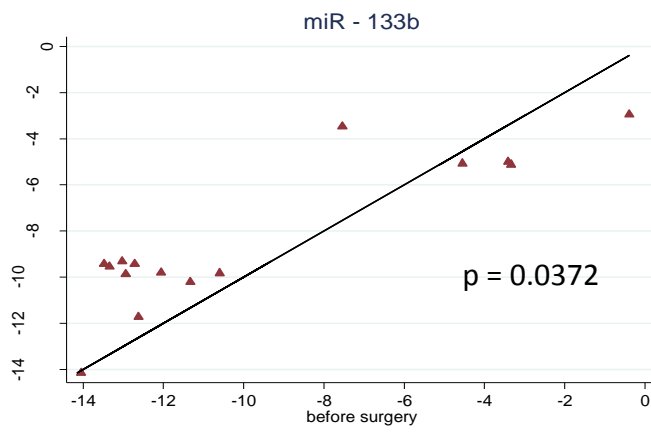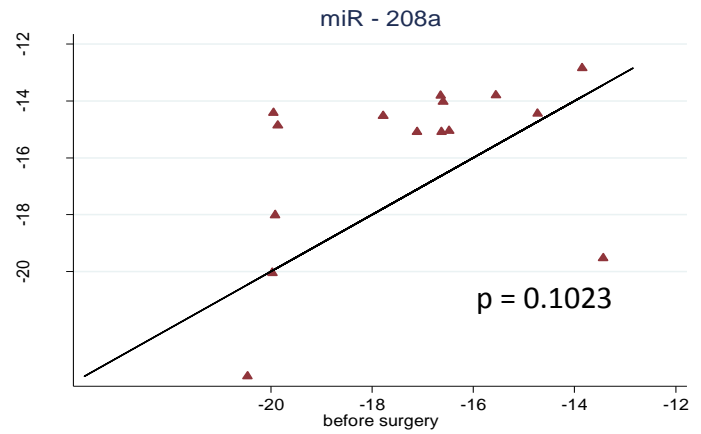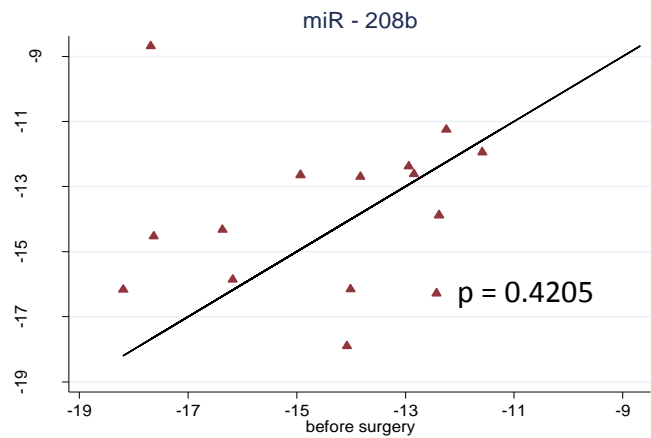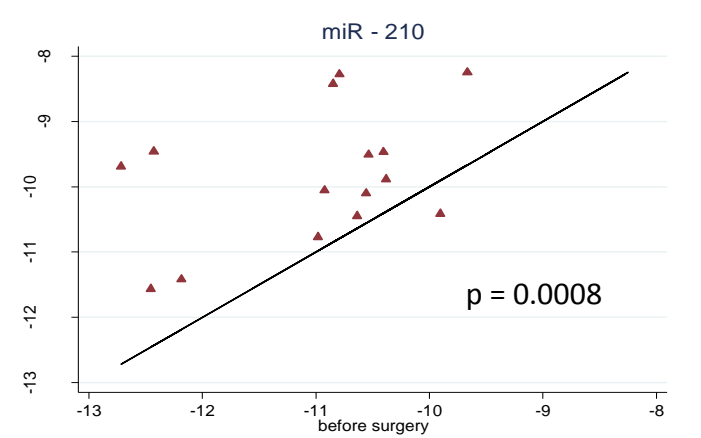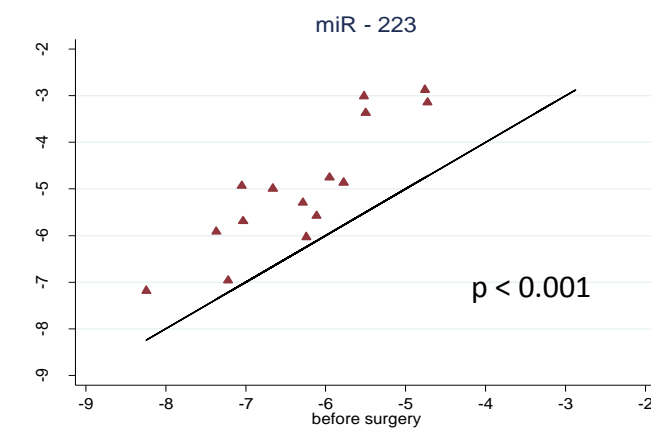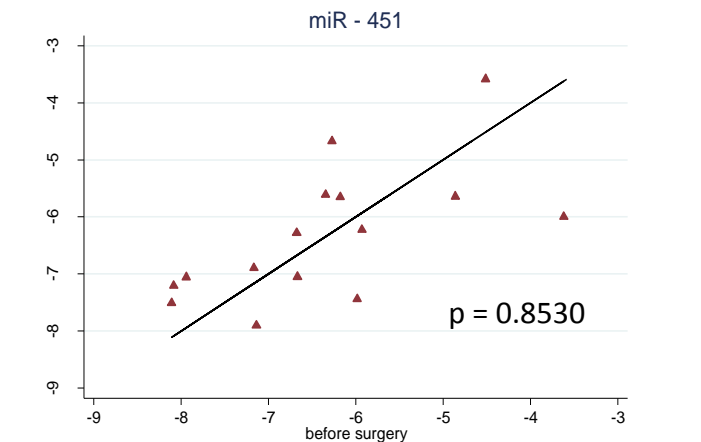

**Supplemental Figure 1: Changes in individual microRNA levels during CABG.** MicroRNAs (miRs) were measured in the plasma obtained before and early at termination of surgery in 15 CABG patients recruited for the COPTIC biobank. The graphs show pre- vs. post-operation levels of the individual miRs (the solid line represents no change between the pre- and post-operation levels). Data were analysed by linear regression. The individual P values are presented on each graph.
